# Supplementary material for: Forecasting oil spills in the Caribbean Sea. The Amuay Refinery Incident
Source: Research Square preprint supplement (doi:10.21203/rs.3.rs-6173552/v1), 2025-04-15
Supplement: Supplementary file 1 [file 5ea7544e1c6e149b0ffd328f.docx]

Supplementary Material

Detection and tracking of several surface ocean spills from satellite. The data was obtained through various sources, including PlanetScope (Planet, 2019) and Landsat 8 (Wulder et al., 2019) (Landsat Data Access, n.d.), both of which were optical sensors, as well as the SAR radar sensor, Sentinel-1.

Table S1. Satellite data from optical sensors used.

| **Date** | **Hour** | **Source** | **Satellite name** | **Resolution/pxl** | **Name of the image where the spill is captured.** |
| --- | --- | --- | --- | --- | --- |
| 30/10/2017 | 14:27:59 p.m. | planet | 4-band PlanetScope Scene | 3m | 20171030_142759_0f34 |
| 1/11/2017 | 15:09:50 p.m. | planet | SkySat Scene | 0.5 m | 20171101_150950_ssc2d3_0008 |
| 1/11/2017 | 15:09:50 p.m. | planet | SkySat Scene | 0.5 m | 20171101_150950_ssc2d2_0012 |
| 1/11/2017 | 14:29:53 p.m. | planet | 3-band PlanetScope Scene | 3m | 20171101_142943_100e |
| 1/11/2017 | 14:29:53 p.m. | planet | 3-band PlanetScope Scene | 3m | 20171101_142945_100e |
| 1/11/2017 | 14:28:47 p.m. | planet | 3-band PlanetScope Scene | 3m | 20171101_142847_1001 |
| 1/11/2017 | 14:28:45 p.m. | planet | PlanetScope Ortho Tile | 3.125m | 880518_1944509_2017-11-01_1001 |
| 2/11/2017 | 14:29:44 p.m. | planet | 4-band PlanetScope Scene | 3m | 20171102_142944_1015 |
| 3/11/2017 | 14:30:03 p.m. | planet | 3-band PlanetScope Scene | 3m | 20171103_143003_1040 |
| 4/11/2017 | 14:32:34 p.m. | planet | 3-band PlanetScope Scene | 3m | 20171104_143235_0e26 |
| 4/11/2017 | 14:29:34 p.m. | planet | 3-band PlanetScope Scene | 3m | 20171104_142934_100b |
| 4/11/2017 | 14:31:10 p.m. | planet | 3-band PlanetScope Scene | 3m | 20171104_143106_0f51 |
| 4/11/2017 | 14:31:45 p.m. | planet | 3-band PlanetScope Scene | 3m | 20171104_143145_0f31 |
| 5/11/2017 | 14:30:01 p.m. | planet | 3-band PlanetScope Scene | 3m | 20171105_143001_1009 |
| 7/11/2017 | 15:23:32 p.m. | landsat | Landsat 8 Operational Land Imager | 30m | L1C_T19PBP_A012420_20171107T151702 |
| 7/11/2017 | 14:31:38 p.m. | planet | 3-band PlanetScope Scene | 3m | 20171107_143138_1027 |
| 8/11/2017 | 14:34:32 p.m. | planet | 4-band PlanetScope Scene | 3m | 20171108_143432_103b |
| 8/11/2017 | 14:34:34 p.m. | planet | 4-band PlanetScope Scene | 3m | 20171108_143434_103b |
| 9/11/2017 | 14:37:25 p.m. | planet | 4-band PlanetScope Scene | 3m | 20171109_143726_0f1b |
